# Supplementary material
Source: PubMed Central journal article supplement (PMC10353436)
Supplement: iai.00491-22-s0001.pdf [file iai.00491-22-s0001.pdf]

SUPPLEMENTAL MATERIALS

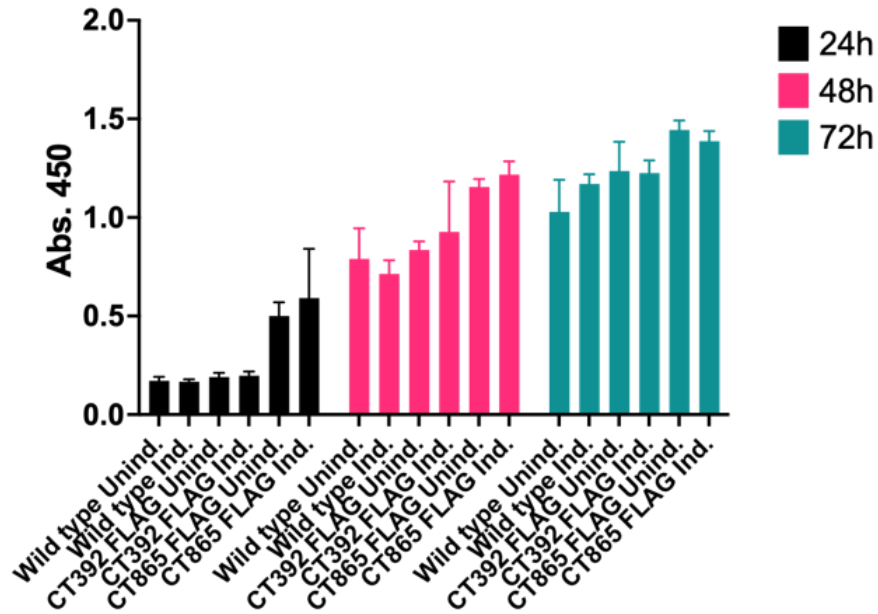

**Fig S1.** Overexpression of CT392 FLAG does not affect cytotoxicity. HeLa cells were infected with chlamydia overexpressing effector-FLAG constructs in either uninduced or 10ng/ul anhydrotetracycline inducing conditions for 24, 48, or 72h. Lactate dehydrogenase release was measured using a Tecan plate reader. Error bars are SD. Results are representative of 3 replicates.

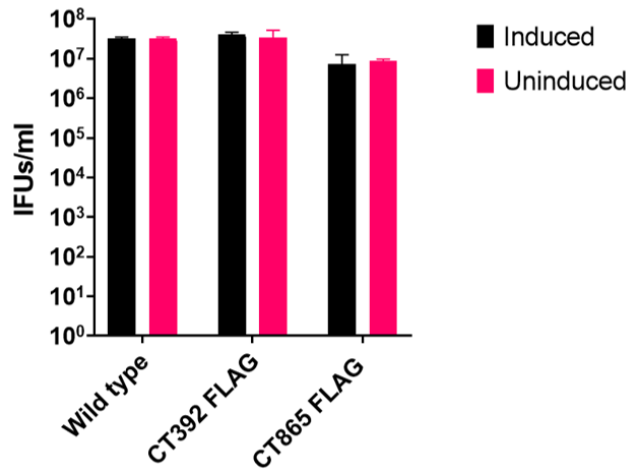

**Fig S2.** Overexpression of CT392 FLAG does not result in a difference in growth at 48hpi. HeLa cells were infected with chlamydia overexpressing effector-FLAG constructs uninduced or induced with 10ng/ul anhydrous tetracycline. IFUs/ml was calculated at 48hpi. Error bars are SD. Results are representative of 3 replicates.

**Table S1.** Primers used in this study.

| Name                                                        | Sequence                                                | Uses                            |
|-------------------------------------------------------------|---------------------------------------------------------|---------------------------------|
| <b>Secretion by <i>Yersinia pseudotuberculosis</i> T3SS</b> |                                                         |                                 |
| NPT F                                                       | ATTGAACAAGATGGATTGCACGCAGGTTCTCC                        | Cloning into pFlag-ctc          |
| NPT R                                                       | CTTGTAGTCGACAGAGAAGAAGAACTCGTCAAGAAGGCGATAG             | Cloning into pFlag-ctc          |
| CTL037 NPT<br>SOE F                                         | CACAGGAGATATCATATGATAGATCCTCTTAAGCTTTT                  | Expression in YP as Flag fusion |
| CTL037 NPT<br>SOE R                                         | GGAGAACCTGCGTGCAATCCATCTTGTTCAATAGAGAATGAGGCAACATTTTAC  | Expression in YP as Flag fusion |
| CTL052 NPT<br>SOE F                                         | CACAGGAGATATCATATGGAAGAGGCGGAAAAGC                      | Expression in YP as Flag fusion |
| CTL052 NPT<br>SOE R                                         | GGAGAACCTGCGTGCAATCCATCTTGTTCAATCGAGTCTAACTCTAAGGACTCT  | Expression in YP as Flag fusion |
| CTL060 NPT<br>SOE F                                         | CACAGGAGATATCATATGCAAGTCCTAGCAAGTTTATT                  | Expression in YP as Flag fusion |
| CTL060 NPT<br>SOE R                                         | GGAGAACCTGCGTGCAATCCATCTTGTTCAATGCCTTCTTAAGAGCGCTGAAAA  | Expression in YP as Flag fusion |
| CTL065 NPT<br>SOE F                                         | CACAGGAGATATCATATGCTATTAGATTCTCGTTCCCTAC                | Expression in YP as Flag fusion |
| CTL065 NPT<br>SOE R                                         | GGAGAACCTGCGTGCAATCCATCTTGTTCAATAGGGATCGCCTCCAACATA     | Expression in YP as Flag fusion |
| CTL105 NPT<br>SOE F                                         | CACAGGAGATATCATATGCAACTCACCTACAAGC                      | Expression in YP as Flag fusion |
| CTL105 NPT<br>SOE R                                         | GGAGAACCTGCGTGCAATCCATCTTGTTCAATACTTTTAGCCTCTCTAGGGACAT | Expression in YP as Flag fusion |
| CTL113 NPT<br>SOE F                                         | CACAGGAGATATCATATGAATATTTATAGATTCATCTC                  | Expression in YP as Flag fusion |
| CTL113 NPT<br>SOE R                                         | GGAGAACCTGCGTGCAATCCATCTTGTTCAATCGCCTTGCGAACGTCTGC      | Expression in YP as Flag fusion |
| CTL137 NPT<br>SOE F                                         | CACAGGAGATATCATATGGATATTCCAGAACAGGGCTC                  | Expression in YP as Flag fusion |
| CTL137 NPT<br>SOE R                                         | GGAGAACCTGCGTGCAATCCATCTTGTTCAATTGCTGAGATCTCTGAAGAAGA   | Expression in YP as Flag fusion |
| CTL307 NPT<br>SOE F                                         | CACAGGAGATATCATATGAATAAAAAAGAACGAAT                     | Expression in YP as Flag fusion |
| CTL307 NPT<br>SOE R                                         | GGAGAACCTGCGTGCAATCCATCTTGTTCAATACTCAGCTTAGTGAATGAAGAGA | Expression in YP as Flag fusion |
| CTL386 NPT<br>SOE F                                         | CACAGGAGATATCATATGAAGCGTTCTCCATGGTATAA                  | Expression in YP as Flag fusion |
| CTL386 NPT<br>SOE R                                         | GGAGAACCTGCGTGCAATCCATCTTGTTCAATAAGAAACAGATATTTCCCGATT  | Expression in YP as Flag fusion |
| CTL404 NPT<br>SOE F                                         | CACAGGAGATATCATATGAAAAAGTTTGTACTTTCT                    | Expression in YP as Flag fusion |
| CTL404 NPT<br>SOE R                                         | GAGAACCTGCGTGCAATCCATCTTGTTCAATTCCTTATCATTGATAGTAATGT   | Expression in YP as Flag fusion |
| CTL604 NPT<br>SOE F                                         | CACAGGAGATATCATATGGGACTATCTCGTCTAGCCTT                  | Expression in YP as Flag fusion |
| CTL604 NPT<br>SOE R                                         | GGAGAACCTGCGTGCAATCCATCTTGTTCAATTGAGGGACTGATTTTGGC      | Expression in YP as Flag fusion |
| CTL614 NPT<br>SOE F                                         | CACAGGAGATATCATATGAGAAAAGCATTCTTGTTTGG                  | Expression in YP as Flag fusion |
| CTL614 NPT<br>SOE R                                         | GGAGAACCTGCGTGCAATCCATCTTGTTCAATAACTGCTGAAATGAATGTC     | Expression in YP as Flag fusion |
| CTL648 NPT<br>SOE F                                         | CACAGGAGATATCATATGTCTTCTATAACAAGGAACA                   | Expression in YP as Flag fusion |
| CTL648 NPT<br>SOE R                                         | GGAGAACCTGCGTGCAATCCATCTTGTTCAATAGCAGGGAAAGAAATAGTC     | Expression in YP as Flag fusion |
| CTL720 NPT<br>SOE F                                         | CACAGGAGATATCATATGAGTCAAAAATAAGAACTCTGC                 | Expression in YP as Flag fusion |
| CTL720 NPT<br>SOE R                                         | GGAGAACCTGCGTGCAATCCATCTTGTTCAATGTAATCCCACATTTTCTTAATGA | Expression in YP as Flag fusion |
| CTL765 NPT<br>SOE F                                         | CACAGGAGATATCATATGTGGCTTTGGTCTTTAGTTA                   | Expression in YP as Flag fusion |

|                                       |                                                        |                                                   |
|---------------------------------------|--------------------------------------------------------|---------------------------------------------------|
| CTL765 NPT<br>SOE R                   | GGAGAACCTGCGTGCAATCCATCTTGTTC AATAAACAGCTGAAGCATGGAACG | Expression in YP as Flag fusion                   |
| CTL799 NPT<br>SOE F                   | CACAGGAGATATCATATGGGTAGATACAGAAGAGT                    | Expression in YP as Flag fusion                   |
| CTL799 NPT<br>SOE R                   | GGAGAACCTGCGTGCAATCCATCTTGTTC AATTCTGAGCCGTAGTCCCCTG   | Expression in YP as Flag fusion                   |
| CTL847 NPT<br>SOE F                   | CACAGGAGATATCATATGACGACGAAACCCAAA ACTCT                | Expression in YP as Flag fusion                   |
| CTL847 NPT<br>SOE R                   | GGAGAACCTGCGTGCAATCCATCTTGTTC AATATTTTGAAATTCTCTAAACG  | Expression in YP as Flag fusion                   |
| CTL891 NPT<br>SOE F                   | CACAGGAGATATCATATGGAAAAGAATTATTATGC                    | Expression in YP as Flag fusion                   |
| CTL891 NPT<br>SOE R                   | GGAGAACCTGCGTGCAATCCATCTTGTTC AATGTAATCCGGCAAGAAACATCC | Expression in YP as Flag fusion                   |
| <b>CyaA and BlaM Tag Construction</b> |                                                        |                                                   |
| CyaA KpnI F                           | CCGGTACCATGCAGCAATCGCATCAGGCTGG                        | Cloning CyaA into pBomb4-tet-mcherry              |
| CyaA Sall R                           | CCGTGCGACTCAGTCGACATAGCCGGAATCCTG                      | Cloning CyaA into pBomb4-tet-mcherry              |
| BlaM KpnI F                           | CCGGTACCATGAGTATTCAACATTTCCGTG                         | Cloning BlaM into pBomb4-tet-mcherry              |
| BlaM Sall R                           | CCACCGGTTTACCAATGCTTAATCAGTGAG                         | Cloning BlaM into pBomb4-tet-mcherry              |
| <b>Novel Candidates For CYA</b>       |                                                        |                                                   |
| CT131 NotI F                          | CCGCGGCCGCATGAAGCGTTCTCCATGGTATAA                      | Expression in CT as CyaA, BlaM or GSK-FLAG fusion |
| CT131 KpnI R                          | CCGGTACCTTCTGTTTCAGAAACTTCCCAC                         | Expression in CT as CyaA, BlaM or GSK-FLAG fusion |
| CT149 NotI F                          | CCGCGGCCGCATGAAAAAGTTTGCTACTTTCCT                      | Expression in CT as CyaA, BlaM or GSK-FLAG fusion |
| CT149 KpnI R                          | CCGGTACCAAGATTTGATTGGAATGCGTTA                         | Expression in CT as CyaA, BlaM or GSK-FLAG fusion |
| CT360 NotI F                          | CCGCGGCCGCATGAAAAAGTTTGCTACTTTCCT                      | Expression in CT as CyaA, BlaM or GSK-FLAG fusion |
| CT360 KpnI R                          | CCGGTACCTTTCTGCTCTCTCTCACAA                            | Expression in CT as CyaA, BlaM or GSK-FLAG fusion |
| CT392 NotI F                          | CCGCGGCCGCATGTCTTCTATACAAGGAAC                         | Expression in CT as CyaA, BlaM or GSK-FLAG fusion |
| CT392 KpnI R                          | CCGGTACCAAATCCTCTATCATCATCGG                           | Expression in CT as CyaA, BlaM or GSK-FLAG fusion |
| CT460 NotI F                          | CCGCGGCCGCATGAGTCAAATAAGAACTCTGC                       | Expression in CT as CyaA, BlaM or GSK-FLAG fusion |
| CT460 KpnI R                          | CCGGTACCTTTAATGATGTGTGAGAAACCA                         | Expression in CT as CyaA, BlaM or GSK-FLAG fusion |
| CT503 NotI F                          | CCGCGGCCGCATGTGGCTTTGGTCTTTAGTTA                       | Expression in CT as CyaA, BlaM or GSK-FLAG fusion |
| CT503 KpnI R                          | CCGGTACCAACCTCTTCTTTGCTAA                              | Expression in CT as CyaA, BlaM or GSK-FLAG fusion |
| CT537 NotI F                          | CCGCGGCCGCATGGGTAGATACAGAAGAG                          | Expression in CT as CyaA, BlaM or GSK-FLAG fusion |
| CT537 KpnI R                          | CCGGTACCATCGTTCTCCATAAAAAAAGC                          | Expression in CT as CyaA, BlaM or GSK-FLAG fusion |

|                 |                                                                     |                                                   |
|-----------------|---------------------------------------------------------------------|---------------------------------------------------|
| CT584 NotI F    | CCGCGGCCGCATGACGACGAAACCCAAAAC                                      | Expression in CT as CyaA, BlaM or GSK-FLAG fusion |
| CT584 KpnI R    | CCGGTACCCACAGATTTTCGTTAATTCTTCAA                                    | Expression in CT as CyaA, BlaM or GSK-FLAG fusion |
| CT627 NotI F    | CCGCGGCCGCATGGAAAAGAATTATTATGC                                      | Expression in CT as CyaA, BlaM or GSK-FLAG fusion |
| CT627 KpnI R    | CCGGTACCTGCTGGTTGGTTTTCTTGTTCCTT                                    | Expression in CT as CyaA, BlaM or GSK-FLAG fusion |
| CT668 NotI F    | CCGCGGCCGCATGATAGATCCTCTTAAGCTTTT                                   | Expression in CT as CyaA, BlaM or GSK-FLAG fusion |
| CT668 KpnI R    | CCGGTACCACCTAACTGGGTTGTCATAATCG                                     | Expression in CT as CyaA, BlaM or GSK-FLAG fusion |
| CT683 NotI F    | CCGCGGCCGCATGGAAGAGCGGAAAAG                                         | Expression in CT as CyaA, BlaM or GSK-FLAG fusion |
| CT683 KpnI R    | CCGGTACCAAATAATGTCTCCTTTTTACTCA                                     | Expression in CT as CyaA, BlaM or GSK-FLAG fusion |
| CT691 NotI F    | CCGCGGCCGCATGCAAGTCCTAGCAAGTTTATT                                   | Expression in CT as CyaA, BlaM or GSK-FLAG fusion |
| CT691 KpnI R    | CCGGTACCTTTCTCTTCTAGCGTCATACTCA                                     | Expression in CT as CyaA, BlaM or GSK-FLAG fusion |
| CT736 NotI F    | CCGCGGCCGCATGCAACTCACCTCACAAG                                       | Expression in CT as CyaA, BlaM or GSK-FLAG fusion |
| CT736 KpnI R    | CCGGTACCGTCTTTTTTCATATGTGCC                                         | Expression in CT as CyaA, BlaM or GSK-FLAG fusion |
| CT744 NotI F    | CCGCGGCCGCATGAATATTTATAGATTCATCTCTGGAAG                             | Expression in CT as CyaA, BlaM or GSK-FLAG fusion |
| CT744 KpnI R    | CCGGTACCCCATGAGGCATCTGCTAATAG                                       | Expression in CT as CyaA, BlaM or GSK-FLAG fusion |
| CT768 NotI F    | CCGCGGCCGCATGGATATTCCAGAACAGGGCTC                                   | Expression in CT as CyaA, BlaM or GSK-FLAG fusion |
| CT768 KpnI R    | CCGGTACCAACAACTGCTGTATTGTCTTT                                       | Expression in CT as CyaA, BlaM or GSK-FLAG fusion |
|                 | <b>Ectopic Expression and Yeast Toxicity of Novel T3S Effectors</b> |                                                   |
| CT392 KpnI F    | CCGGTACCATGTCTTCTATACAAGGAACA                                       | Expression in HeLa                                |
| CT392 KpnI +1 F | CCGGTACCAATGTCTTCTATACAAGGAACA                                      | Expression in <i>S. cerevisiae</i>                |
| CT392 XhoI R    | CCCTCGAGAAATCCTCTATCATCATCGG                                        | Expression in HeLa or <i>S. cerevisiae</i>        |
| CT460 KpnI F    | CCGGTACCATGAGTCAAAATAAGAACTCTGC                                     | Expression in HeLa                                |
| CT460 KpnI +1 F | CCGGTACCAATGAGTCAAAATAAGAACTCTGC                                    | Expression in <i>S. cerevisiae</i>                |
| CT460 XhoI R    | CCCTCGAGTTTAATGATGTGTTGAGAAACCA                                     | Expression in HeLa or <i>S. cerevisiae</i>        |
| CT537 KpnI F    | CCGGTACCATGGGTAGATACAGAAGAG                                         | Expression in HeLa                                |
| CT537 KpnI +1 F | CCGGTACCAATGGGTAGATACAGAAGAG                                        | Expression in <i>S. cerevisiae</i>                |
| CT537 XhoI R    | CCCTCGAGATCGTTCTCCATAAAAAAGC                                        | Expression in HeLa or <i>S. cerevisiae</i>        |
| CT627 KpnI F    | CCGGTACCATGGAAGAATTATTATGC                                          | Expression in HeLa                                |

|                                            |                                  |                                            |
|--------------------------------------------|----------------------------------|--------------------------------------------|
| CT627 KpnI +1<br>F                         | CCGGTACCAATGGAAAAGAATTATTATGC    | Expression in <i>S. cerevisiae</i>         |
| CT627 XhoI R                               | CCCTCGAGTGCTGGTTGGTTTTCTTGTTCTT  | Expression in HeLa or <i>S. cerevisiae</i> |
| CT691 KpnI F                               | CCGGTACCATGCAAGTCCTAGCAAGTTTATT  | Expression in HeLa                         |
| CT691 KpnI +1<br>F                         | CCGGTACCAATGCAAGTCCTAGCAAGTTTATT | Expression in <i>S. cerevisiae</i>         |
| CT691 XhoI R                               | CCCTCGAGTTTCTCTTCTAGCGTCATACTCA  | Expression in HeLa or <i>S. cerevisiae</i> |
| CT736 KpnI F                               | CCGGTACCATGCAACTCACCTCACAAG      | Expression in HeLa                         |
| CT736 KpnI +1<br>F                         | CCGGTACCAATGCAACTCACCTCACAAGC    | Expression in <i>S. cerevisiae</i>         |
| CT736 XhoI R                               | CCCTCGAGGTCTTTTTCATATGTGCCCATCA  | Expression in HeLa or <i>S. cerevisiae</i> |
| <b>Yeast Toxicity Truncations of CT392</b> |                                  |                                            |
| CT392 KpnI +1<br>F                         | CCGGTACCAATGTCTTCTATACAAGGAACA   | Expression in <i>S. cerevisiae</i>         |
| CT392 -20aa<br>C-term XhoI R               | CCCTCGAGAAATCCTCTATCATCATCGG     | Expression in <i>S. cerevisiae</i>         |
| CT392 -40aa<br>C-term XhoI R               | CCCTCGAGAGGGTCTTCCACAGAAGGACTAG  | Expression in <i>S. cerevisiae</i>         |
| CT392 -80aa<br>C-term XhoI R               | CCCTCGAGTGGACGCATGTAATAGTCTGTGT  | Expression in <i>S. cerevisiae</i>         |
| CT392 -100aa<br>C-term XhoI R              | CCCTCGAGAAAGAAACGCAAGATCTGGTAGT  | Expression in <i>S. cerevisiae</i>         |
| CT392 -20aa<br>N-term KpnI<br>+1 F         | CCGGTACCAATGGAGGGGATGAATCCCGAAG  | Expression in <i>S. cerevisiae</i>         |
| CT392 -40aa<br>N-term KpnI<br>+1 F         | CCGGTACCAATGGGGAAGAGTACCTCTGCA   | Expression in <i>S. cerevisiae</i>         |
| CT392 -60aa<br>N-term KpnI<br>+1 F         | CCGGTACCAATGGCAATGGCATCTTCTCC    | Expression in <i>S. cerevisiae</i>         |
| CT392 -80aa<br>N-term KpnI<br>+1 F         | CCGGTACCAATGATCGCGGATGTAATGGAGAA | Expression in <i>S. cerevisiae</i>         |
| CT392 -100aa<br>N-term KpnI<br>+1 F        | CCGGTACCAATGGCTCTACTGCAAGCGATTTC | Expression in <i>S. cerevisiae</i>         |
| CT392 -200aa<br>N-term KpnI<br>+1 F        | CCGGTACCATAGCGATACGGTTCTAGCTCGC  | Expression in <i>S. cerevisiae</i>         |
| CT392 XhoI R                               | CCCTCGAGAAATCCTCTATCATCATCGG     | Expression in <i>S. cerevisiae</i>         |
